# Supplementary material for: Design of nitrogen-doped graphitized 2D hierarchical porous carbons as efficient solid base catalysts for transesterification to biodiesel
Source: Royal Society of Chemistry journal article supplement (doi:10.1039/c9gc03960k), 2020-01-01
Supplement: c9gc03960k1.pdf [file c9gc03960k1.pdf]

## **Electronic Supplementary Information**

### **Design of nitrogen-doped, graphitized 2D hierarchical porous carbons as efficient solid base catalysts towards transesterification to biodiesel**

Weiping Kong<sup>1</sup>, Fujian Liu<sup>\*1,3</sup> and Yong Liu<sup>\*2</sup>

<sup>1</sup> Department of Chemistry, Shaoxing University, Shaoxing, P. R. China.

<sup>2</sup> Henan Key Laboratory of Polyoxometalate Chemistry, College of Chemistry and  
Chemical Engineering, Henan University, Kaifeng, 475004, P. R. China.

<sup>3</sup> National Engineering Research Center of Chemical Fertilizer Catalyst (NERC-CFC),  
School of Chemical Engineering, Fuzhou University, Fuzhou, 350002, P. R. China.

\* To whom correspondence should be addressed.

E-mail: [fjliu@fzu.edu.cn](mailto:fjliu@fzu.edu.cn), [liuyong79@126.com](mailto:liuyong79@126.com).

**Table S1** A comparison in the transesterification of tripalmitin with methanol catalyzed by N-HPC-800 and other reported solid catalysts.

| Catalysts                                                                                               | Reaction conditions                                                                   | Yield of methyl palmitate (%) | Refs.                                                            |
|---------------------------------------------------------------------------------------------------------|---------------------------------------------------------------------------------------|-------------------------------|------------------------------------------------------------------|
| <b>N-HPC-800</b>                                                                                        | <b>1.04 mmol of tripalmitin, 3.76 mL of methanol, 50 mg of catalyst, 65 °C, 14 h</b>  | <b>86.3</b>                   | <b>This work</b>                                                 |
| Ta <sub>2</sub> O <sub>5</sub> /SiO <sub>2</sub> -[H <sub>3</sub> PW <sub>12</sub> O <sub>40</sub> /Me] | 2 wt% catalyst, tripalmitin: MeOH =1:90, 65 °C, 24 h                                  | 65.9                          | <i>Green Chem.</i> , 2009, <b>11</b> , 314–317                   |
| PDVB-SO <sub>3</sub> H-24                                                                               | 1.04 mmol of tripalmitin, 2.47 mL of methanol, 0.1 g of catalyst, 65 °C, 12 h         | 78.0                          | <i>Catal. Comm.</i> , 2012, <b>26</b> , 140–143                  |
| Nafion NR50                                                                                             | 1.04 mmol of tripalmitin, 3.76 mL of methanol, 50 mg of catalyst, 65 °C, 16 h         | 61.1                          | <i>Appl. Catal. B: Environ.</i> , 2013, <b>136–137</b> , 193–201 |
| SO <sub>4</sub> /ZrO <sub>2</sub>                                                                       |                                                                                       | 53.1                          |                                                                  |
| PS-SO <sub>3</sub> H/SiO <sub>2</sub>                                                                   | 0.52 mmol of tripalmitin, 2 mL of methanol, 0.04 mmol of H <sup>+</sup> , 80 °C, 21 h | 80.9                          | <i>Appl. Catal. A: Gen.</i> , 2016, <b>516</b> , 1–8             |
| H <sub>3</sub> PW <sub>12</sub> O <sub>40</sub> /Ta <sub>2</sub> O <sub>5</sub> -10.8                   | 2 wt% catalyst, tripalmitin: MeO =1:90, 65 °C, 6 h                                    | 51.4                          | <i>Green Chem.</i> , 2008, <b>10</b> , 746–755                   |
| PrSO <sub>3</sub> H/SBA-BTSP100%                                                                        | 10 mmol of tripalmitin, 12.5 mL of methanol, 50 mg of catalyst, 80 °C, 24 h           | 74.0                          | <i>Catal. Lett.</i> , 2015, <b>145</b> , 1483–1490               |
| NPC-[C <sub>3</sub> N][SO <sub>3</sub> CF <sub>3</sub> ]                                                | 2.08 mmol of tripalmitin, 0.2 g of catalyst, 7.41 mL of methanol, 65 °C, 14 h         | 82.9                          | <i>Catal. Sci. Technol.</i> , 2016, <b>6</b> , 2995–3007         |
| SO <sub>4</sub> <sup>2-</sup> -1.2/ZrO <sub>2</sub> -SiO <sub>2</sub> (Et-1.00)                         | 0.442 g of tripalmitin, 2.0 mL of methanol, 0.1 g of catalyst, 65 °C, 10 h            | 51.8                          | <i>ChemSusChem</i> , 2011, <b>4</b> , 744–756                    |
| NaOH                                                                                                    | 0.84 g of tripalmitin, 3.76 mL of methanol, 0.05g of catalyst, 65 °C, 3 h             | 85.2                          | <i>ChemSusChem</i> , 2011, <b>4</b> , 1059–1062                  |
| MOP-ethylbenzene-SO <sub>3</sub> H                                                                      | 1.04 mmol of tripalmitin, 2.47 mL of methanol, 0.1 g of catalyst, 65 °C, 14 h         | 86.7                          | <i>Green Chem.</i> , 2016, <b>18</b> , 6536–6544                 |

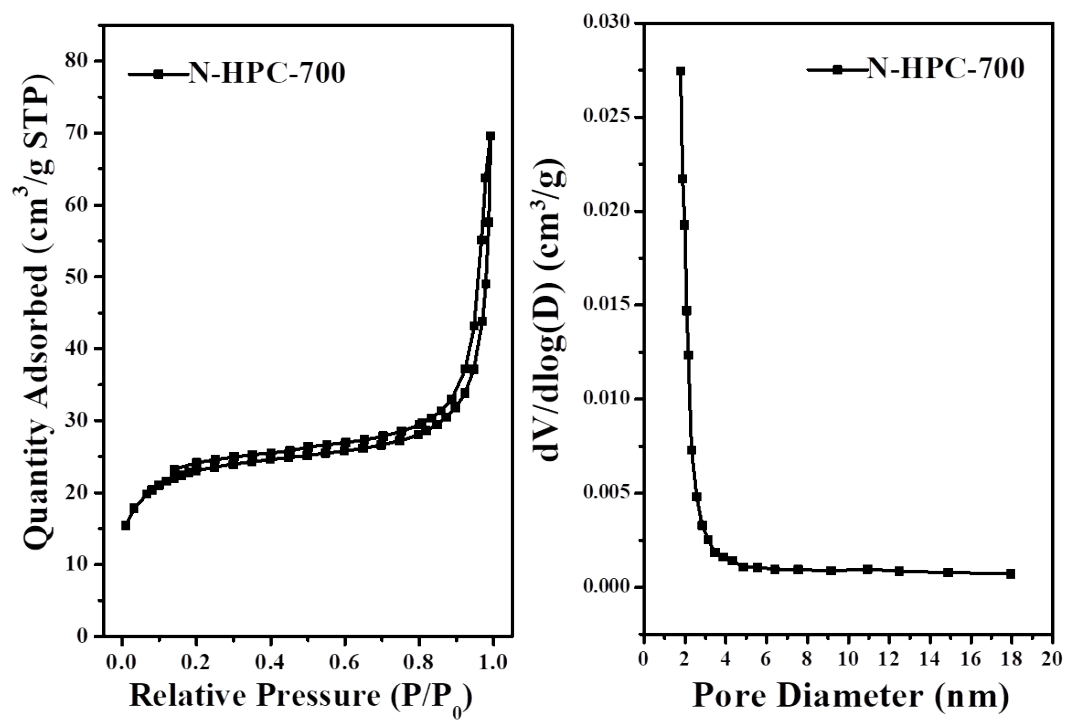

**Figure S1** (left) N<sub>2</sub> adsorption–desorption isotherm and (right) pore size distribution of N-HPC-700.
